# Supplementary material for: Impact of metal oxide nanoparticles on in vitro DNA amplification
Source: PeerJ journal article supplement (doi:10.7717/peerj.7228), 2019-06-27
Supplement: 2019-5-20_Figure_S1.pdf [file 2019-5-20_Figure_S1.pdf]

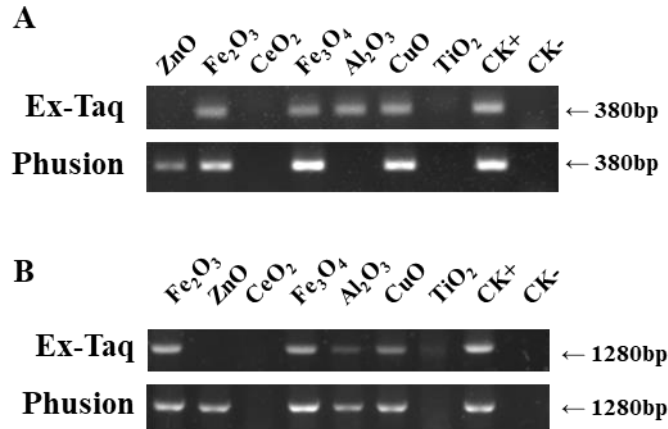

**Figure S1.** Effects of DNA template and amplicon size in NP-PCR. (A) a hard copy of Figure 1 (for convenient comparison). (B) NP-PCR was performed with another DNA template and primers. The DNA template is pMD18T vector with a gentamycin gene insertion. The 1280 bp PCR product contains the coding sequence of the gentamycin gene and its flanking regions.
